# Supplementary material
Source: PubMed Central journal article supplement (PMC4058109)
Supplement: supp_127.12.2627_JCS134833.pdf [file supp_127.12.2627_JCS134833.pdf]

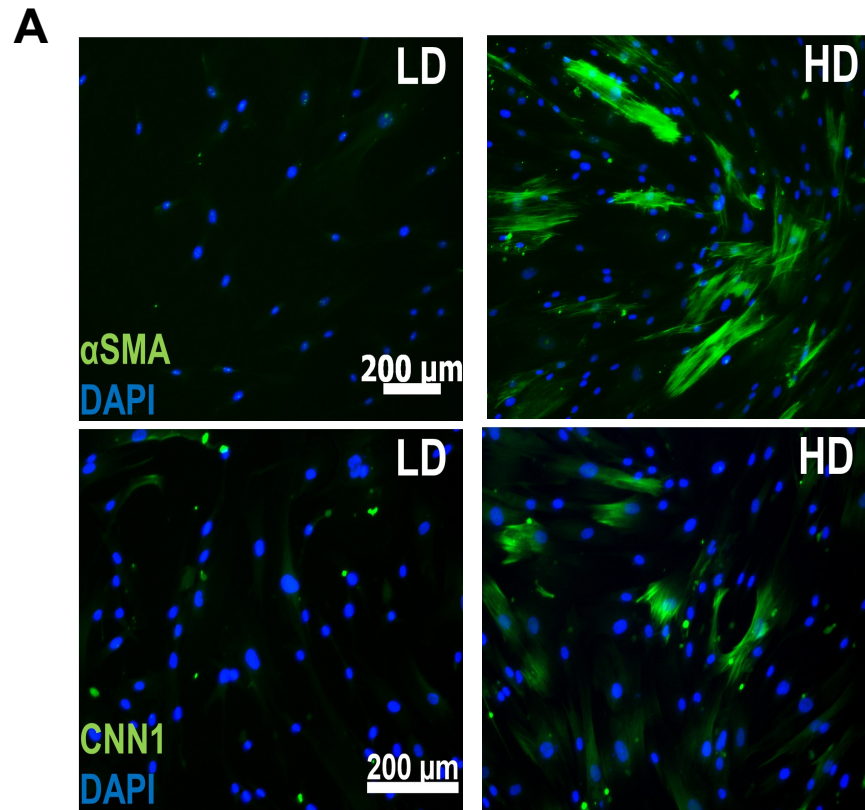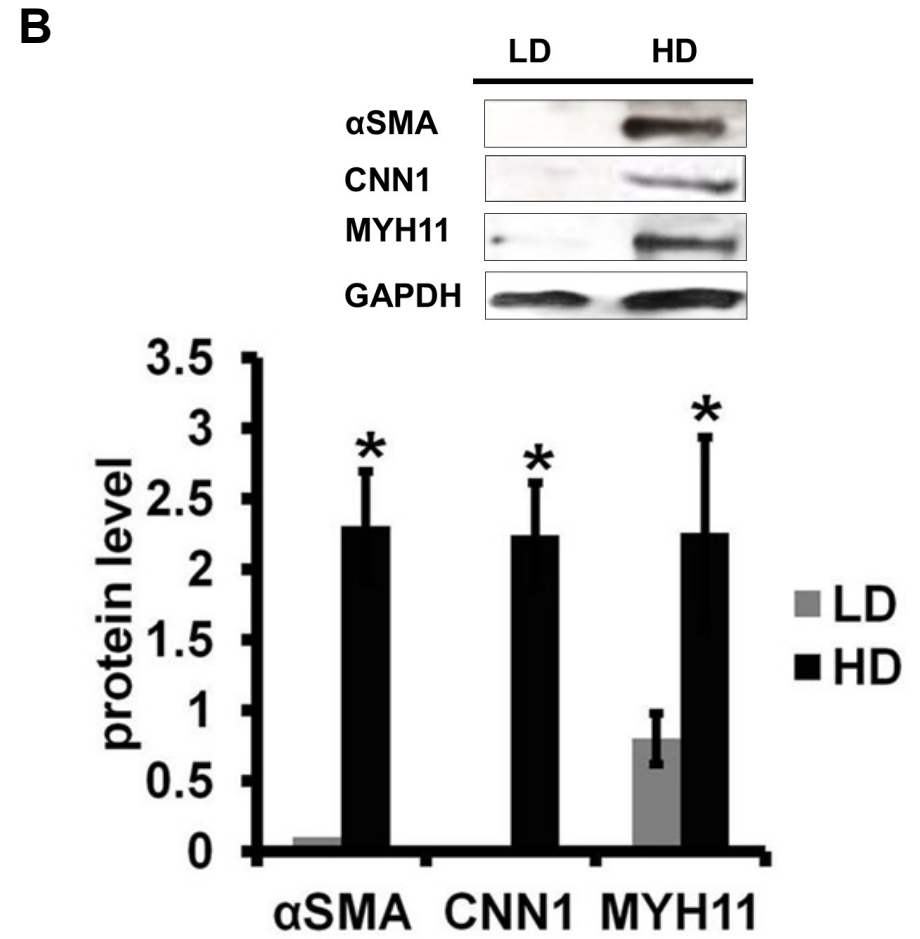

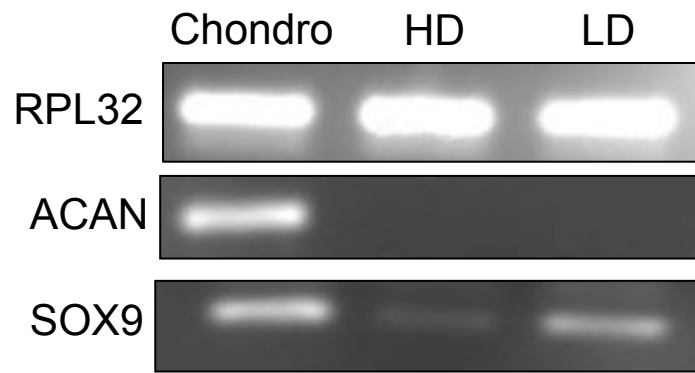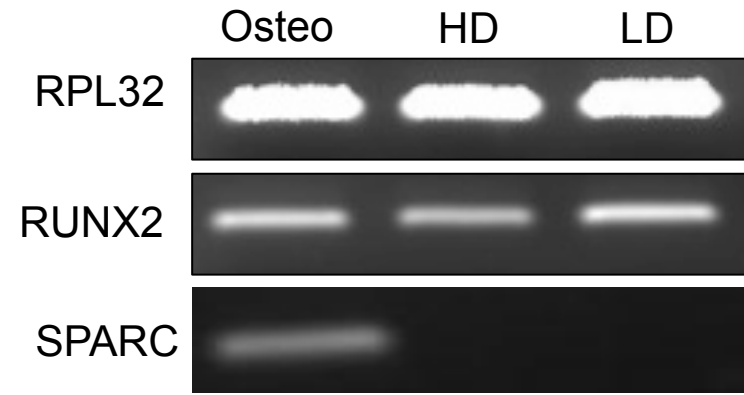

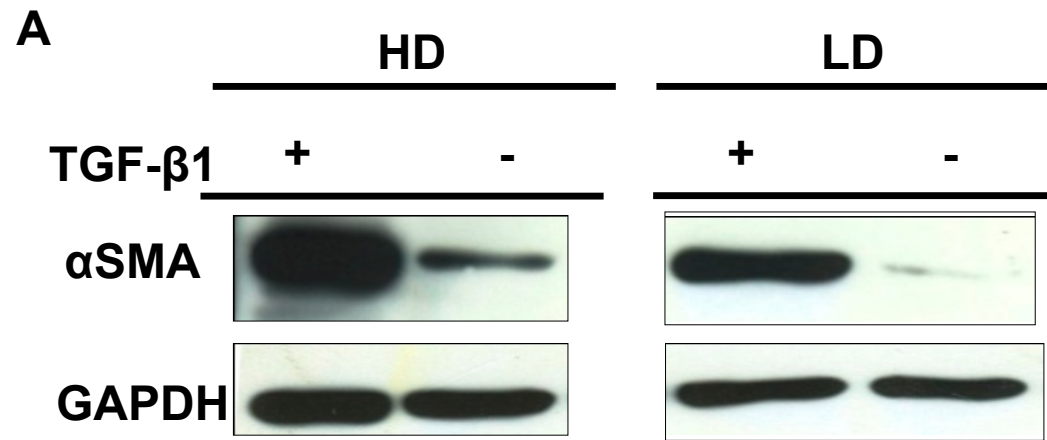

**Fig. S1. High cell density promoted myogenic differentiation of bone marrow mesenchymal stem cells.** BM-MSCs were seeded at low density (LD:  $3 \times 10^3$  cells/cm<sup>2</sup>) or high density (HD:  $30 \times 10^3$  cells/cm<sup>2</sup>) and 5 days later they were evaluated. **(A)** Immunostaining for  $\alpha$ SMA or CNN1 (green); The nuclei were stained with DAPI (blue); Bar=200 $\mu$ m. **(B)** WB for myogenic proteins  $\alpha$ SMA, CNN1 and MYH11. (\*) denotes  $p < 0.05$  between HD and LD cells.

**Fig. S2. High cell density does not induce differentiation into osteogenic or chondrogenic lineages.** RT-PCR for chondrogenic (ACAN, SOX9) or osteogenic (RUNX2, SPARC) genes in low densities or high densities cultures in growth medium. RPL32 served as housekeeping gene. HF-MSCs that were coaxed to differentiate into the chondrogenic (Chondro) or osteogenic (Osteo) lineage using well-established differentiation factors served as positive control.

**Fig. S3. High cell density induced  $\alpha$ SMA expression.** HF-MSCs were seeded at low density (LD:  $3 \times 10^3$  cells/cm<sup>2</sup>) or high density (HD:  $30 \times 10^3$  cells/cm<sup>2</sup>) in presence or absence of TGF- $\beta$ 1 (10ng/ml) and 5 days later the level of  $\alpha$ SMA was measured using western blotting; GAPDH served as loading control.

**Table S1. Cloning of different siRNAs**

|                   | Accession number       | Gene                            | Sense sequence (5'-3')     |
|-------------------|------------------------|---------------------------------|----------------------------|
| control           |                        | Scramble                        | CAACAAGATGAAGAGCACCAA      |
| siCDH11           | NM_033664              | Cadherin-11                     | GCGTATACCAGATGTCTGTGTCAGAA |
| siTGF $\beta$ RII | NM_004257              | TGF $\beta$ RII                 | GGGATTTATACAGTTTGCACAACCTT |
| siROCK            | NM_004850<br>NM_005406 | ROCK isoforms (ROCK1 and ROCK2) | CAACGGCAAAGAATCTGTTATTACT  |
| siCDH2            | NM_001792              | Cadherin-2                      | CAGCCTCCAACCTGGTATCTTCATTA |

**Table S2. Primers for (qRT)-PCR**

| Accession number | Gene         | Sense sequence (5'-3')                           |
|------------------|--------------|--------------------------------------------------|
| NM_001792        | Cadherin-2   | CTGACACTGTGGAGCCTGAT<br>GTGGAGCCACTGCCTTCATA     |
| NM_033664        | Cadherin-11  | CTGGCTCAACATCACTGTCT<br>CGGTTGTCTCTGACTGTGAA     |
| NM_001141945     | $\alpha$ SMA | GACAGCTACGTGGGTGACGAA<br>GATGCCATGTTCTATCGGGTACT |
| NM_033138.3      | CALD1        | AGATTGAAAGGCGAAGAGCA<br>TTCAAGCCAGCAGTTTCCTT     |

|                |                                  |                                                      |
|----------------|----------------------------------|------------------------------------------------------|
| NM_001001522.1 | SM22                             | ATGGCCAACAAGGGTCC<br>CTTCAAAGAGGTCAACAG              |
| NM_011577      | TGF- $\beta$ 1                   | CAACACATCAGAGCTCCGAGAA<br>AAGGCGAAAGCCCTCAATTT       |
| NM_000994      | Ribosomal protein<br>L32 (RPL32) | AGCGTAACTGGCGGAAAC<br>CGTTGTGGACCAGGAACTTC           |
| NM_001015051   | RUNX2                            | TGTGGAGTTTGGTGTCTACTAGTGTGT<br>GAAATCTGCCATGTGACTGCC |
| NM_199173      | SPARC                            | ATCTTCCCTGTACACTGGCAGTTC<br>CTCGGTGTGGGAGAGGTACC     |
| NM_001135      | ACAN                             | GTCTCACTGCCCAACTAC<br>GGAACACGATGCCTTTCAC            |
| NM_000346      | SOX9                             | GAGCAGACGCACATCTC<br>CCTGGGATTGCCCGA                 |
